# Supplementary material for: Effects of sodium chloride on rheological behaviour of the gemini-like surfactants
Source: Royal Society of Chemistry journal article supplement (doi:10.1039/d0sm00243g), 2020-01-01
Supplement: d0sm00243g1.pdf [file d0sm00243g1.pdf]

Electronic Supplementary Information (ESI) for

**Effects of sodium chloride on rheological behaviour of the Gemini-like Surfactants**

Xinxin Li,<sup>ab</sup> Pengxiang Wang,<sup>ab</sup> Xiaoyu Hou,<sup>ab</sup> Fang Wang,<sup>ab</sup> Han Zhao,<sup>ab</sup> Bobo Zhou,<sup>ab</sup> Hongwen Zhang,<sup>ab</sup> Hongbin Yang<sup>ab</sup> and Wanli Kang<sup>\*abc</sup>

<sup>a</sup>. Key Laboratory of Unconventional Oil & Gas Development (China University of Petroleum (East China)), Ministry of Education, Qingdao 266580, P. R. China

<sup>b</sup>. School of Petroleum Engineering, China University of Petroleum (East China), Qingdao 266580, P. R. China.

<sup>c</sup>. Kazakh-British Technical University, Almaty 050000, Kazakhstan

\*Corresponding Author: Wanli Kang, email: kangwanli@upc.edu.cn

Additional Results

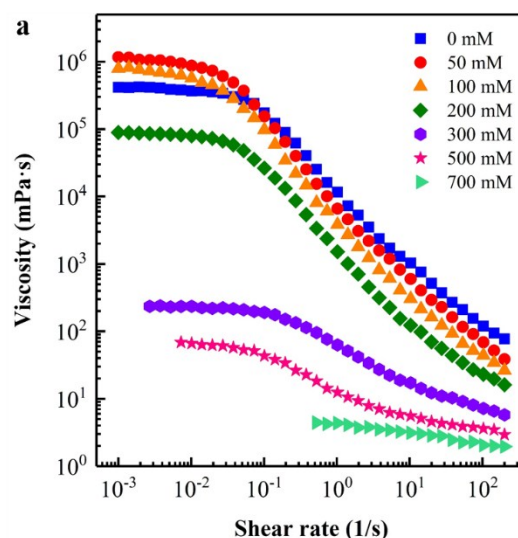

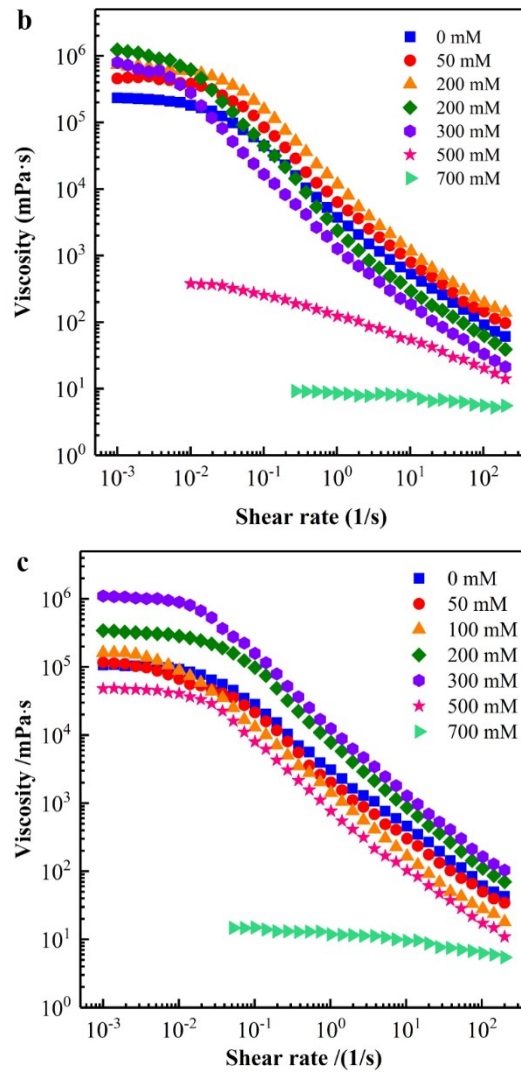

**Fig.S1** Steady rheological curves of 15 mM EAPA solutions at different NaCl concentrations and 25 °C

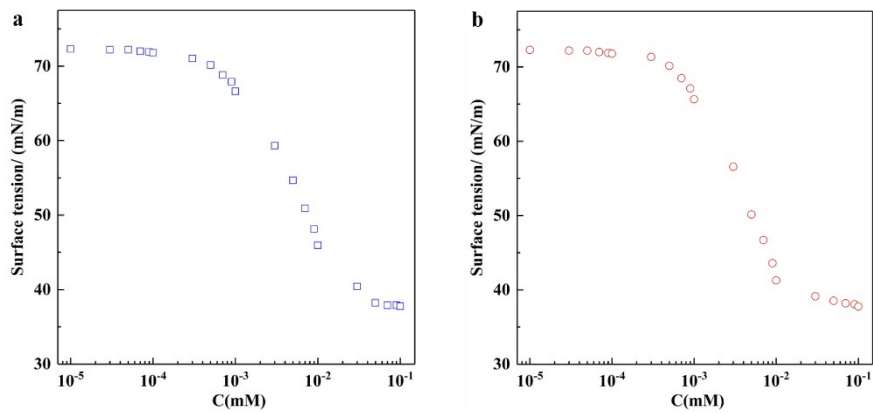

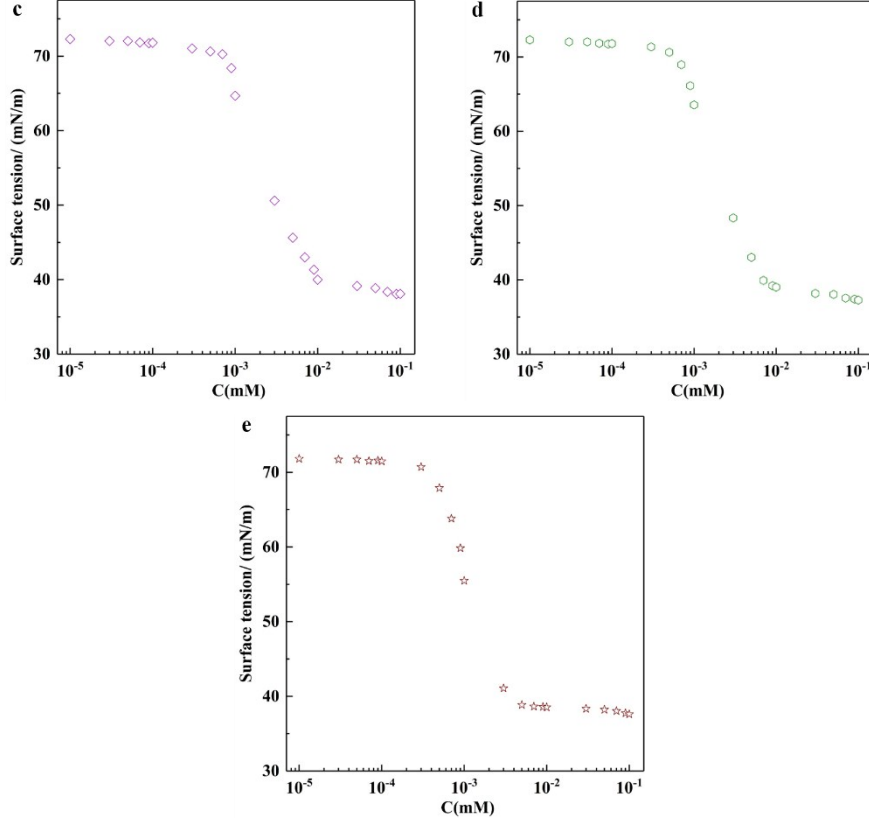

**Fig.S2** Variation in surface tension with concentration of *p*-EAPA at 25 °C (a: C(NaCl)=0 mM, b: C(NaCl)=50 mM, c: C(NaCl)=100 mM, d: C(NaCl)=200 mM, e: C(NaCl)=300 mM.)

The C(NaCl) refers to the NaCl concentration of 15 mM *p*-EAPA, and different concentrations of *p*-EAPA were obtained by diluting 15 mM *p*-EAPA.

The minimum average area per surfactant molecule  $A_{\min}$  was calculated by Gibbs adsorption equation:

$$\Gamma_{\max} = -\frac{1}{2.303nRT} \left( \frac{\partial \gamma}{\partial \log C} \right)_T$$

$$A_{\min} = \frac{1}{N_A \Gamma_{\max}}$$

where,  $\Gamma_{\max}$  ( $\mu\text{mol}/\text{m}^2$ ) is the saturated adsorption amounts of the surfactants,  $(\partial \gamma / \partial \log C)_T$  is the slope of the surface tension curve,  $R = 8.31 \text{ J} / (\text{mol} \cdot \text{K})$ ,  $T = 298.15 \text{ K}$ ,  $N_A = 6.02 \times 10^{23}$ ,  $n$  is a constant which depends on the number of species constituting the surfactant and which are adsorbed at the interface. And  $n$  takes 2 for an ionic surfactant where the surfactant ion and the counterion are univalent, while  $n$  takes 3 for Gemini surfactants. Therefore,  $n$  takes 3 in this research.

The length  $l_c(\text{cm})$  and volume  $V(\text{cm}^3)$  of hydrophobic chain of surfactants was obtained by characteristic parameters of surfactants:

$$l_c = (1.50 + 1.265n_c) \times 10^{-8}$$

$$V = (27.4 + 26.9n_c) \times 10^{-24}$$

Where  $n_c$  is the number of carbon atoms in hydrophobic chain of surfactants and takes 21 according to the structure of UC<sub>22</sub>AMPM.

According to the  $A_{\min}$ ,  $lc$  and  $v$ , the packing parameter  $p$  can be calculated by  $p=V/A_{\min}lc$ . And the calculated results were listed in the Table.S1.

**Table.S1** The Surface parameters of *p*-EAPA system at different NaCl concentrations and 25 °C

| C(NaCl)/mM | $lc(\text{nm})$ | $V(\text{nm}^3)$ | $A_{\min}(\text{nm}^2)$ | $p$    |
|------------|-----------------|------------------|-------------------------|--------|
| 0          | 2.8065          | 0.5923           | 0.653                   | 0.3232 |
| 50         |                 |                  | 0.623                   | 0.3388 |
| 100        |                 |                  | 0.578                   | 0.3651 |
| 200        |                 |                  | 0.503                   | 0.4196 |
| 300        |                 |                  | 0.459                   | 0.4598 |
